# Supplementary material for: Preliminary insights into the gut microbiota of patients with rheumatoid arthritis in Vietnam
Source: PeerJ. 2025 Dec 18;13:e20521. doi: 10.7717/peerj.20521 (PMC12718522; doi:10.7717/peerj.20521)
Supplement: Supplemental Information 2 [file peerj-13-20521-s002.xlsx]

## Sheet: TableS1
Table S1. Differences in the relative abundance of gut microbiota taxa between patients with rheumatoid arthritis and healthy controls assessed by the Mann Whitney U test
Bacterial taxa		Mann Whitney U test		Mean relative abundance		Log2 fold change (RA/HC)
		Nominal p value	Adjusted p value$	HC	RA
Phylum	p__Bacteroidota	0.00203429	0.0162743	25.2664	16.4046	-0.623122
	p__Fusobacteriota	0.0107119	0.0428477	0.786217	0.0585919	-3.74615
	p__Proteobacteria	0.0247125	0.0659	2.95304	6.51438	1.14143
Class	p__Bacteroidota.c__Bacteroidia	0.00203429	0.0223772	25.2664	16.4046	-0.623122
	p__Fusobacteriota.c__Fusobacteriia	0.0107119	0.0589156	0.786217	0.0585919	-3.74615
	p__Proteobacteria.c__Gammaproteobacteria	0.0230705	0.084592	2.93982	6.51252	1.14749
Order	p__Actinobacteriota.c__Actinobacteria.o__Actinomycetales	0.00351451	0.0307896	0.0183617	0.0569964	1.63417
	p__Bacteroidota.c__Bacteroidia.o__Bacteroidales	0.00203429	0.027463	25.261	16.4026	-0.622991
	p__Firmicutes.c__Bacilli.o__Lactobacillales	0.0323025	0.112929	1.58217	3.41878	1.11158
	p__Firmicutes.c__Clostridia.o__Peptostreptococcales-Tissierellales	0.0247125	0.111206	2.33747	5.29368	1.17932
	p__Fusobacteriota.c__Fusobacteriia.o__Fusobacteriales	0.0107119	0.0578445	0.786217	0.0585919	-3.74615
	p__Proteobacteria.c__Gammaproteobacteria.o__Enterobacterales	0.00456142	0.0307896	2.36007	6.11978	1.37465
	p__Actinobacteriota.c__Actinobacteria.o__Corynebacteriales	0.00154357	0.027463	0.00337449	0.0224954	2.73689
	p__Firmicutes.c__Clostridia.o__Peptococcales	0.0334605	0.112929	0.024731	0.311773	3.6561
Family	p__Actinobacteriota.c__Actinobacteria.o__Actinomycetales.f__Actinomycetaceae	0.00351451	0.0412955	0.0183617	0.0569964	1.63417
	p__Actinobacteriota.c__Coriobacteriia.o__Coriobacteriales.f__Eggerthellaceae	0.00351322	0.0412955	0.408773	0.983466	1.26657
	p__Bacteroidota.c__Bacteroidia.o__Bacteroidales.f__Bacteroidaceae	0.00068314	0.0321076	18.2151	8.03399	-1.18094
	p__Bacteroidota.c__Bacteroidia.o__Bacteroidales.f__Prevotellaceae	0.0472725	0.201983	3.40737	5.4623	0.680852
	p__Firmicutes.c__Bacilli.o__Lactobacillales.f__Streptococcaceae	0.0150378	0.0883468	0.869954	2.69552	1.63155
	p__Firmicutes.c__Clostridia.o__Oscillospirales.f__Ruminococcaceae	0.0139656	0.0883468	15.0373	12.3851	-0.279944
	p__Fusobacteriota.c__Fusobacteriia.o__Fusobacteriales.f__Fusobacteriaceae	0.0107119	0.0839102	0.785956	0.0585919	-3.74568
	p__Proteobacteria.c__Gammaproteobacteria.o__Enterobacterales.f__Enterobacteriaceae	0.00587656	0.0552396	2.29107	5.97607	1.38318
	p__Actinobacteriota.c__Actinobacteria.o__Corynebacteriales.f__Corynebacteriaceae	0.00154357	0.0362738	0.00337449	0.0224954	2.73689
	p__Firmicutes.c__Bacilli.o__Lactobacillales.f__Enterococcaceae	0.0404914	0.190309	0.0186264	0.197574	3.40697
	p__Firmicutes.c__Clostridia.o__Peptococcales.f__Peptococcaceae	0.0334605	0.174738	0.024731	0.311773	3.6561
Genus	p__Actinobacteriota.c__Actinobacteria.o__Actinomycetales.f__Actinomycetaceae.g__Actinomyces	0.00298499	0.0596999	0.0179964	0.0561314	1.6411
	p__Bacteroidota.c__Bacteroidia.o__Bacteroidales.f__Bacteroidaceae.g__Bacteroides	0.00068314	0.0273256	18.2151	8.03399	-1.18094
	p__Bacteroidota.c__Bacteroidia.o__Bacteroidales.f__Prevotellaceae.g__Prevotella_9	0.00496758	0.0745137	2.43141	3.92862	0.692231
	p__Desulfobacterota.c__Desulfovibrionia.o__Desulfovibrionales.f__Desulfovibrionaceae.g__Bilophila	0.0111349	0.121471	0.155238	0.0807517	-0.942919
	p__Firmicutes.c__Bacilli.o__Erysipelotrichales.f__Erysipelotrichaceae.g__Faecalibaculum	0.00143063	0.034335	0.00847475	0.0209088	1.30287
	p__Firmicutes.c__Bacilli.o__Erysipelotrichales.f__Erysipelotrichaceae.g__Turicibacter	0.00638356	0.0851141	0.26414	0.75371	1.51271
	p__Firmicutes.c__Bacilli.o__Lactobacillales.f__Streptococcaceae.g__Streptococcus	0.0186885	0.160187	0.749613	2.51983	1.74911
	p__Firmicutes.c__Clostridia.o__Lachnospirales.f__Lachnospiraceae.g__Fusicatenibacter	0.0200627	0.160502	2.14847	1.1749	-0.870778
	p__Firmicutes.c__Clostridia.o__Lachnospirales.f__Lachnospiraceae.unclassified	0.0344785	0.243378	3.62681	4.60797	0.34543
	p__Firmicutes.c__Clostridia.o__Oscillospirales.f__Ruminococcaceae.g__[Eubacterium]_siraeum_group	0.0460503	0.290844	0.194068	0.0247841	-2.96907
	p__Fusobacteriota.c__Fusobacteriia.o__Fusobacteriales.f__Fusobacteriaceae.g__Fusobacterium	0.00854646	0.102557	0.782567	0.0513622	-3.92944
	p__Proteobacteria.c__Gammaproteobacteria.o__Enterobacterales.f__Enterobacteriaceae.g__Escherichia-Shigella	0.0150378	0.150378	1.46266	2.68188	0.874646
	p__Proteobacteria.c__Gammaproteobacteria.o__Enterobacterales.f__Enterobacteriaceae.g__Klebsiella	0.0163317	0.150754	0.0404564	0.648844	4.00343
	p__Proteobacteria.c__Gammaproteobacteria.o__Enterobacterales.f__Enterobacteriaceae.unclassified	0.00460133	0.0745137	0.786558	2.59607	1.7227
	p__Actinobacteriota.c__Actinobacteria.o__Corynebacteriales.f__Corynebacteriaceae.g__Corynebacterium	0.0011412	0.034236	0.00324381	0.0224954	2.79387
	p__Firmicutes.c__Bacilli.o__Erysipelotrichales.f__Erysipelotrichaceae.g__Solobacterium	< 0.001	0.00767845	0.000773889	0.0454761	5.87682
	p__Firmicutes.c__Bacilli.o__Lactobacillales.f__Enterococcaceae.g__Enterococcus	0.0404914	0.269943	0.0186264	0.197454	3.40609
	p__Firmicutes.c__Bacilli.o__Lactobacillales.f__Streptococcaceae.g__Lactococcus	0.000526574	0.0273256	0.120342	0.175685	0.545851
	p__Firmicutes.c__Clostridia.o__Peptococcales.f__Peptococcaceae.g__Peptococcus	0.0242234	0.181675	0.020173	0.308491	3.93473
Amplicon sequence variant (ASV)*	ASV_622 (g_Turicibacter)	0.002	0.053	0.0318213	0.43715	3.78007
	ASV_701 (g_Bacteroides)	0.002	0.046	0.129828	0.00721254	-4.16994
	ASV_803 (f_Enterobacteriaceae)	0.013	0.166	0.417796	0.591761	0.502216
	ASV_1390 (g_Fusicatenibacter)	0.016	0.171	2.10723	1.11896	-0.91319
	ASV_1537 (g_Bacteroides)	0.042	0.321	0.345603	0.153708	-1.16892
	ASV_1695 (f_Enterobacteriaceae)	<0.001	0.017	0.0314734	0.659872	4.38998
	ASV_1772 (g_Escherichia-Shigella)	0.015	0.171	1.21615	2.52767	1.05549
	ASV_2421 (g_Clostridium_sensu_stricto_1)	0.009	0.134	0.455512	1.33832	1.55486
	ASV_3065 (g_Bacteroides)	0.003	0.054	0.484778	0.12236	-1.98619
	ASV_3334 (g_Klebsiella)	0.016	0.171	0.0404564	0.612102	3.91933
	ASV_3530 (f_Enterobacteriaceae)	0.034	0.286	0.282102	0.17732	-0.669863
	ASV_3637 (g_Bacteroides)	0.009	0.134	1.41968	0.439647	-1.69115
	ASV_3961 (g_Faecalibaculum)	0.001	0.046	0.00847475	0.0209088	1.30287
	ASV_4230 (g_Akkermansia)	0.048	0.353	0.00758105	0.0365802	2.27059
	ASV_41 (f_Lachnospiraceae)	0.001	0.046	0.00312337	0.0106224	1.76594
	ASV_546 (g_Solobacterium)	0.001	0.046	0.000486752	0.00597219	3.61697
	ASV_1817 (g_Lactococcus)	0.003	0.054	0.00502084	0.0387332	2.94757
	ASV_1944 (f_Ruminococcaceae)	0.017	0.171	0.670199	1.63766	1.28898
	ASV_2046 (g_Streptococcus)	0.028	0.253	0.0490855	0.132644	1.43419
	ASV_2280 (g_Erysipelatoclostridium)	<0.001	0.013	0	0.0146555	20.483
	ASV_2334 (g_Streptococcus)	0.003	0.054	0.0670319	0.399792	2.57633
	ASV_2534 (g_Negativibacillus)	0.031	0.266	0.0402737	0.143201	1.83013
	ASV_3757 (g_Faecalibacterium)	0.024	0.233	0.00402923	0.0127487	1.66177
	ASV_4133 (g_Lactococcus)	0.006	0.102	0.112831	0.134639	0.254935
	ASV_4178 (g_Bacteroides)	0.042	0.321	0.140462	0.312649	1.15436
Only taxa with nominal p values < 0.05 were included in the table.
$P values adjusted for multiple comparisons using the Benjamini-Hochberg (BH) procedure.
RA, rheumatoid arthritis; HC, healthy controls
*ASVs were labeled with their respective taxonomic assignments

## Sheet: TableS2
Table S2. Differential absolute abundance of gut microbiota taxa between patients with rheumatoid arthritis and healthy controls identified by ANCOM-BC2
Bacterial taxa		Log2 fold change	Standard error (SE)	Nominal p value	Adjusted p value$
Phylum	p__Fusobacteriota	-1.3301	0.557726	0.025335	0.20268
Class	p__Proteobacteria.c__Gammaproteobacteria	1.06764	0.461855	0.0260302	0.286332
Order	p__Actinobacteriota.c__Actinobacteria.o__Actinomycetales	0.891913	0.339883	0.0132014	0.118813
	p__Firmicutes.c__Bacilli.o__Lactobacillales	0.955313	0.459099	0.0438957	0.187164
	p__Proteobacteria.c__Gammaproteobacteria.o__Enterobacterales	1.54453	0.59026	0.0124691	0.118813
	p__Actinobacteriota.c__Actinobacteria.o__Corynebacteriales	1.10789	0.293209	0.000973486	0.0262841
	p__Firmicutes.c__Clostridia.o__Peptococcales	1.39634	0.555262	0.0187125	0.126309
Family	p__Actinobacteriota.c__Actinobacteria.o__Actinomycetales.f__Actinomycetaceae	0.949516	0.348429	0.0103324	0.107302
	p__Actinobacteriota.c__Coriobacteriia.o__Coriobacteriales.f__Eggerthellaceae	0.886099	0.334125	0.0114151	0.107302
	p__Bacteroidota.c__Bacteroidia.o__Bacteroidales.f__Bacteroidaceae	-0.965645	0.409359	0.0233004	0.136883
	p__Bacteroidota.c__Bacteroidia.o__Bacteroidales.f__Prevotellaceae	1.5429	0.668309	0.0262116	0.136883
	p__Firmicutes.c__Bacilli.o__Lactobacillales.f__Streptococcaceae	1.17915	0.500983	0.0235896	0.136883
	p__Firmicutes.c__Clostridia.o__Oscillospirales.f__UCG-010	0.808763	0.348157	0.0308398	0.144947
	p__Proteobacteria.c__Gammaproteobacteria.o__Enterobacterales.f__Enterobacteriaceae	1.596	0.586559	0.00958967	0.107302
	p__Proteobacteria.c__Gammaproteobacteria.o__Enterobacterales.f__Pasteurellaceae	1.64437	0.485019	0.0022387	0.0526095
	p__Actinobacteriota.c__Actinobacteria.o__Corynebacteriales.f__Corynebacteriaceae	1.10025	0.306078	0.00152985	0.0526095
	p__Actinobacteriota.c__Actinobacteria.o__Micrococcales.f__Micrococcaceae	0.638618	0.287142	0.0378248	0.148147
	p__Firmicutes.c__Bacilli.o__Lactobacillales.f__Enterococcaceae	1.024	0.454595	0.0351112	0.148147
	p__Firmicutes.c__Clostridia.o__Peptococcales.f__Peptococcaceae	1.39317	0.557957	0.0194777	0.136883
Genus	p__Actinobacteriota.c__Actinobacteria.o__Actinomycetales.f__Actinomycetaceae.g__Actinomyces	0.896011	0.337657	0.0122966	0.134145
	p__Bacteroidota.c__Bacteroidia.o__Bacteroidales.f__Bacteroidaceae.g__Bacteroides	-0.982995	0.385516	0.0147141	0.147141
	p__Bacteroidota.c__Bacteroidia.o__Bacteroidales.f__Prevotellaceae.g__Alloprevotella	1.06301	0.512548	0.0445623	0.257902
	p__Bacteroidota.c__Bacteroidia.o__Bacteroidales.f__Prevotellaceae.g__Prevotella_9	2.51257	0.811352	0.0036161	0.0807526
	p__Desulfobacterota.c__Desulfovibrionia.o__Desulfovibrionales.f__Desulfovibrionaceae.g__Bilophila	-1.02736	0.43184	0.0223489	0.206298
	p__Desulfobacterota.c__Desulfovibrionia.o__Desulfovibrionales.f__Desulfovibrionaceae.g__Desulfovibrio	1.11432	0.494314	0.0328304	0.239643
	p__Firmicutes.c__Bacilli.o__Erysipelotrichales.f__Erysipelotrichaceae.g__Faecalibaculum	0.784819	0.284205	0.00910279	0.117133
	p__Firmicutes.c__Bacilli.o__Erysipelotrichales.f__Erysipelotrichaceae.g__Turicibacter	1.71976	0.601423	0.00671062	0.100659
	p__Firmicutes.c__Bacilli.o__Lactobacillales.f__Streptococcaceae.g__Streptococcus	1.10639	0.485182	0.0279905	0.239643
	p__Firmicutes.c__Clostridia.o__Oscillospirales.f__Ruminococcaceae.g__CAG-352	-1.37429	0.472323	0.00976108	0.117133
	p__Firmicutes.c__Clostridia.o__Oscillospirales.f__UCG-010.g__UCG-010	0.758104	0.341101	0.0379434	0.239643
	p__Firmicutes.c__Clostridia.o__Peptostreptococcales-Tissierellales.f__Anaerovoracaceae.g__[Eubacterium]_brachy_group	0.727269	0.345541	0.0451329	0.257902
	p__Fusobacteriota.c__Fusobacteriia.o__Fusobacteriales.f__Fusobacteriaceae.g__Fusobacterium	-1.28133	0.583135	0.0378914	0.239643
	p__Proteobacteria.c__Gammaproteobacteria.o__Enterobacterales.f__Enterobacteriaceae.g__Escherichia-Shigella	1.33279	0.607967	0.0343981	0.239643
	p__Proteobacteria.c__Gammaproteobacteria.o__Enterobacterales.f__Enterobacteriaceae.g__Klebsiella	1.42471	0.426337	0.00230425	0.0807526
	p__Proteobacteria.c__Gammaproteobacteria.o__Enterobacterales.f__Enterobacteriaceae.unclassified	1.74408	0.56882	0.00403763	0.0807526
	p__Proteobacteria.c__Gammaproteobacteria.o__Enterobacterales.f__Pasteurellaceae.g__Haemophilus	1.59193	0.47651	0.00253559	0.0807526
	p__Actinobacteriota.c__Actinobacteria.o__Corynebacteriales.f__Corynebacteriaceae.g__Corynebacterium	0.94389	0.289774	0.00360902	0.0807526
	p__Firmicutes.c__Bacilli.o__Erysipelotrichales.f__Erysipelotrichaceae.g__Solobacterium	1.04168	0.337981	0.00613559	0.100659
	p__Firmicutes.c__Bacilli.o__Lactobacillales.f__Enterococcaceae.g__Enterococcus	0.983741	0.441538	0.0369443	0.239643
	p__Firmicutes.c__Clostridia.o__Peptococcales.f__Peptococcaceae.g__Peptococcus	1.89828	0.444007	0.000663954	0.0796744
Amplicon sequence variant (ASV)*	ASV_622 (g_Turicibacter)	1.30453	0.447863	0.00682763	0.0734974
	ASV_706 (f_Lachnospiraceae)	-0.471846	0.193794	0.0217882	0.142401
	ASV_765 (g_Haemophilus)	1.1238	0.340835	0.00378924	0.0547433
	ASV_803 (f_Enterobacteriaceae)	1.02899	0.450592	0.0294006	0.173559
	ASV_910 (g_Bacteroides)	-1.34622	0.319419	< 0.001	0.0237258
	ASV_944 (g_Oscillibacter)	-0.908162	0.30518	0.00596303	0.0682022
	ASV_1016 (g_Lachnospira)	-0.873263	0.323732	0.0123298	0.0981025
	ASV_1330 (g_Bilophila)	-0.812702	0.327735	0.0184258	0.134877
	ASV_1519 (g_Bacteroides)	-0.886211	0.403853	0.0358266	0.192832
	ASV_1695 (f_Enterobacteriaceae)	1.48016	0.360997	< 0.001	0.0237258
	ASV_1764 (g_Parabacteroides)	-1.00574	0.302567	0.00377572	0.0547433
	ASV_1772 (g_Escherichia-Shigella)	1.2475	0.571563	0.0351494	0.192832
	ASV_1968 (g_Streptococcus)	0.732821	0.26721	0.0122014	0.0981025
	ASV_2368 (g_Blautia)	-1.14664	0.320112	0.00229687	0.0547433
	ASV_2421 (g_Clostridium_sensu_stricto_1)	1.17672	0.498906	0.0240576	0.151812
	ASV_2473 (g_Alistipes)	-1.28002	0.319866	0.000524621	0.0240014
	ASV_2926 (g_Alistipes)	0.817368	0.344083	0.0312862	0.178918
	ASV_3065 (g_Bacteroides)	-1.12779	0.360484	0.0035927	0.0547433
	ASV_3260 (g_Parasutterella)	-1.21815	0.415971	0.00802968	0.0816351
	ASV_3334 (g_Klebsiella)	1.26877	0.364166	0.00158967	0.0484849
	ASV_3510 (f_Lachnospiraceae)	0.588659	0.217042	0.0121619	0.0981025
	ASV_3637 (g_Bacteroides)	-1.25456	0.411459	0.00416662	0.0547433
	ASV_3961 (g_Faecalibaculum)	0.721941	0.244972	0.00567712	0.0682022
	ASV_4197 (g_Bacteroides)	-1.03138	0.381376	0.0115087	0.0981025
	ASV_546 (g_Solobacterium)	0.667223	0.189306	0.00418801	0.0547433
	ASV_1817 (g_Lactococcus)	0.869429	0.254141	0.00350114	0.0547433
	ASV_1850 (g_Alistipes)	-1.81954	0.409105	< 0.001	0.0237258
	ASV_2828 (f_Lachnospiraceae)	-0.450411	0.210262	0.04211	0.220175
	ASV_2946 (g_Butyricicoccus)	0.698997	0.259925	0.0149906	0.114303
	ASV_3237 (g_Lachnospiraceae_UCG-001)	-0.830103	0.345054	0.027803	0.169598
	ASV_3490 (f_Lachnospiraceae)	0.566519	0.206996	0.012038	0.0981025
	ASV_3634 (g_Christensenellaceae_R-7_group)	-1.60222	0.41782	0.00132696	0.0484849
	ASV_3757 (g_Faecalibacterium)	0.46778	0.181151	0.0208209	0.141767
	ASV_4133 (g_Lactococcus)	-1.09863	0.431652	0.0209164	0.141767
Only taxa with nominal p values < 0.05 were included in the table.
$P values adjusted for multiple comparisons using the Benjamini-Hochberg (BH) procedure.
*ASVs were labeled with their respective taxonomic assignments.
Log2 fold change and SE were derived from ANCOM-BC2.

## Sheet: TableS3
Table S3. Significantly altered bacterial genera were identified between patient subgroups based on RA clinical characteristics
A. Disease Activity Score 28 (DAS28)-CRP: High disease activity, Moderate disease activity, and Remission/Low disease activity
Bacterial taxa		Kruskal–Wallis test		Dunn's test for pairwise comparison			Mean relative abundance
		Nominal p value	Adjusted p value$	High disease activity - Moderate disease activity	High disease activity - Remission/Low disease activity	Moderate disease activity - Remission/Low disease activity	High disease activity	Moderate disease activity	Remission/Low disease activity
Phylum	p__Fusobacteriota	0.0307331	0.307331	0.0278839	0.143728	0.0234096	0.0857023	0	0.058297
Class	p__Fusobacteriota.c__Fusobacteriia	0.0307331	0.368798	0.0278839	0.143728	0.0234096	0.0857023	0	0.058297
Order	p__Fusobacteriota.c__Fusobacteriia.o__Fusobacteriales	0.0307331	0.720505	0.0278839	0.143728	0.0234096	0.0857023	0	0.058297
Family	p__Actinobacteriota.c__Coriobacteriia.o__Coriobacteriales.f__Coriobacteriales_Incertae_Sedis	0.0330713	0.44889	0.0139759	0.344315	0.109895	0.577518	0.048614	0.114367
	p__Bacteroidota.c__Bacteroidia.o__Bacteroidales.f__Bacteroidaceae	0.0435396	0.44889	0.0278599	0.200897	0.0402267	8.69976	4.70042	11.8161
	p__Bacteroidota.c__Bacteroidia.o__Bacteroidales.f__Rikenellaceae	0.021142	0.44889	0.0282989	0.0333437	0.427992	1.27203	0.403167	0.159811
	p__Fusobacteriota.c__Fusobacteriia.o__Fusobacteriales.f__Fusobacteriaceae	0.0307331	0.44889	0.0278839	0.143728	0.0234096	0.0857023	0	0.058297
	p__Proteobacteria.c__Gammaproteobacteria.o__Enterobacterales.f__Pasteurellaceae	0.0440089	0.44889	0.0264571	0.427329	0.0513037	0.0629975	0.368413	0.0270145
Genus	p__Actinobacteriota.c__Coriobacteriia.o__Coriobacteriales.f__Coriobacteriales_Incertae_Sedis.g__Raoultibacter	0.0118248	0.320732	0.0167342	0.0971375	0.00839078	0.0234869	0.00166376	0.0638751
	p__Actinobacteriota.c__Coriobacteriia.o__Coriobacteriales.f__Coriobacteriales_Incertae_Sedis.unclassified	0.045152	0.345413	0.0585289	0.0480614	0.406482	0.554031	0.0469503	0.0504916
	p__Actinobacteriota.c__Coriobacteriia.o__Coriobacteriales.f__Eggerthellaceae.g__Adlercreutzia	0.0409562	0.345413	0.0525351	0.0465111	0.413315	0.307027	0.078542	0.032706
	p__Actinobacteriota.c__Coriobacteriia.o__Coriobacteriales.f__Eggerthellaceae.g__Eggerthella	0.0179224	0.320732	0.0559493	0.0440554	0.00792381	0.12601	0.00783668	0.88156
	p__Bacteroidota.c__Bacteroidia.o__Bacteroidales.f__Bacteroidaceae.g__Bacteroides	0.0435396	0.345413	0.0278599	0.200897	0.0402267	8.69976	4.70042	11.8161
	p__Bacteroidota.c__Bacteroidia.o__Bacteroidales.f__Prevotellaceae.g__Alloprevotella	0.0254349	0.320732	0.0582829	0.0586891	0.0120833	0.459579	1.41666	0.0291779
	p__Bacteroidota.c__Bacteroidia.o__Bacteroidales.f__Rikenellaceae.g__Alistipes	0.00801052	0.320732	0.00814881	0.0323766	0.456644	1.24959	0.347434	0.150331
	p__Firmicutes.c__Bacilli.o__Erysipelotrichales.f__Erysipelotrichaceae.g__[Clostridium]_innocuum_group	0.0234333	0.320732	0.042339	0.0744292	0.012471	0.109703	0.0150025	0.13566
	p__Firmicutes.c__Bacilli.o__Erysipelotrichales.f__Erysipelotrichaceae.g__Faecalitalea	0.0106222	0.320732	0.0298743	0.0505936	0.00525981	0.0464276	0.00169413	0.231674
	p__Firmicutes.c__Bacilli.o__Erysipelotrichales.f__Erysipelotrichaceae.g__Holdemania	0.033677	0.322037	0.0650887	0.0686197	0.016554	0.0266518	0.00919491	0.0505231
	p__Firmicutes.c__Clostridia.o__Oscillospirales.f__Oscillospiraceae.g__Flavonifractor	0.0303084	0.320732	0.0256224	0.153844	0.0244291	0.0926868	0.0102516	0.159434
	p__Firmicutes.c__Clostridia.o__Peptostreptococcales-Tissierellales.f__Anaerovoracaceae.g__[Eubacterium]_brachy_group	0.00565218	0.320732	0.0289313	0.0296011	0.00242475	0.0656934	0.00891751	0.318956
	p__Fusobacteriota.c__Fusobacteriia.o__Fusobacteriales.f__Fusobacteriaceae.g__Fusobacterium	0.0307331	0.320732	0.0278839	0.143728	0.0234096	0.0758789	0	0.0478472
	p__Firmicutes.c__Clostridia.o__Peptostreptococcales-Tissierellales.f__Peptostreptococcaceae.g__Peptostreptococcus	0.0281743	0.320732	0.0222626	0.318723	0.0250448	0.000575597	0.00334665	0
	p__Firmicutes.c__Negativicutes.o__Veillonellales-Selenomonadales.f__Veillonellaceae.g__Veillonella	0.0109296	0.320732	0.00432749	0.201745	0.140401	0.104684	0.192884	0.0547493
	p__Proteobacteria.c__Gammaproteobacteria.o__Enterobacterales.f__Pasteurellaceae.g__Haemophilus	0.0440089	0.345413	0.0264571	0.427329	0.0513037	0.0629975	0.365936	0.0270145
	p__Firmicutes.c__Clostridia.o__Lachnospirales.f__Lachnospiraceae.g__Cellulosilyticum	0.029338	0.320732	0.237819	0.015725	0.0144357	0.00123161	0	0.121469
	p__Firmicutes.c__Clostridia.o__Lachnospirales.f__Lachnospiraceae.g__Lactonifactor	0.0258609	0.320732	0.23813	0.0138376	0.0127429	0.00368533	0.00116463	0.0142143
	p__Firmicutes.c__Clostridia.o__Lachnospirales.f__Lachnospiraceae.g__Tuzzerella	0.0314443	0.320732	0.352964	0.0133145	0.0263404	0.0801496	0.00403928	0.131839
	p__Fusobacteriota.c__Fusobacteriia.o__Fusobacteriales.f__Fusobacteriaceae.unclassified	0.0269575	0.320732	0.314717	0.0107815	0.0159734	0.0098234	0	0.0104498
B. Disease Activity Score 28 (DAS28)-ESR: High disease activity versus Moderate disease activity
Bacterial taxa		Mann Whitney U test		Mean relative abundance
		Nominal p value	Adjusted p value$	High disease activity	Moderate disease activity
Phylum	p__Patescibacteria	0.024504	0.220536	0.00250507	0.0133633
Class	p__Patescibacteria.c__Saccharimonadia	0.024504	0.294048	0.00250507	0.0133633
Order	p__Firmicutes.c__Bacilli.o__RF39	0.0324443	0.301948	0.0424617	0
	p__Firmicutes.c__Clostridia.o__Christensenellales	0.0402597	0.301948	0.825184	0.0450845
	p__Firmicutes.c__Clostridia.o__Oscillospirales	0.0298701	0.301948	17.2906	8.50433
	p__Patescibacteria.c__Saccharimonadia.o__Saccharimonadales	0.024504	0.301948	0.00250507	0.0133633
Family	p__Firmicutes.c__Bacilli.o__RF39.f__RF39	0.0324443	0.513312	0.0424617	0
	p__Firmicutes.c__Clostridia.o__Christensenellales.f__Christensenellaceae	0.0402597	0.513312	0.825184	0.0450845
	p__Firmicutes.c__Clostridia.o__Oscillospirales.f__Ruminococcaceae	0.0298701	0.513312	13.3711	6.14046
	p__Patescibacteria.c__Saccharimonadia.o__Saccharimonadales.f__Saccharimonadaceae	0.024504	0.513312	0.00250507	0.0133633
Genus	p__Firmicutes.c__Bacilli.o__RF39.f__RF39.g__RF39	0.0324443	0.56372	0.0424617	0
	p__Firmicutes.c__Clostridia.o__Christensenellales.f__Christensenellaceae.g__Christensenellaceae_R-7_group	0.0402597	0.621789	0.738509	0.0417465
	p__Firmicutes.c__Clostridia.o__Lachnospirales.f__Lachnospiraceae.g__[Eubacterium]_hallii_group	0.00909091	0.347228	2.34508	7.14969
	p__Firmicutes.c__Clostridia.o__Lachnospirales.f__Lachnospiraceae.g__Blautia	0.0298701	0.56372	10.6044	17.6317
	p__Firmicutes.c__Clostridia.o__Oscillospirales.f__Oscillospiraceae.g__UCG-005	0.0298701	0.56372	0.372027	0.0202337
	p__Firmicutes.c__Clostridia.o__Oscillospirales.f__Ruminococcaceae.g__Subdoligranulum	0.00519481	0.347228	1.54835	0.150745
	p__Firmicutes.c__Bacilli.o__Lactobacillales.f__Lactobacillaceae.g__Lactiplantibacillus	0.00643427	0.347228	0.00128097	0.0479796
	p__Firmicutes.c__Clostridia.o__Lachnospirales.f__Lachnospiraceae.g__Tuzzerella	0.0151129	0.420139	0.0562562	0.130943
	p__Patescibacteria.c__Saccharimonadia.o__Saccharimonadales.f__Saccharimonadaceae.g__TM7x	0.00999217	0.347228	0.00193452	0.0115088
C. Rheumatoid factor (RF): High versus Normal/Low concentration
Bacterial taxa		Mann Whitney U test		Mean relative abundance
		Nominal p value	Adjusted p value$	RF high positive	RF normal/RF low positive
Family	p__Actinobacteriota.c__Coriobacteriia.o__Coriobacteriales.f__Atopobiaceae	0.0328093	0.377307	0.0484921	0.0097756
	p__Actinobacteriota.c__Coriobacteriia.o__Coriobacteriales.f__Eggerthellaceae	0.00241245	0.110973	1.22696	0.334151
	p__Firmicutes.c__Bacilli.o__Lactobacillales.f__Streptococcaceae	0.0266173	0.377307	3.45318	0.675078
	p__Firmicutes.c__Clostridia.o__Oscillospirales.f__Oscillospiraceae	0.0133489	0.307024	2.41917	0.95314
	p__Firmicutes.c__Clostridia.o__Peptostreptococcales-Tissierellales.f__Anaerovoracaceae	0.0487315	0.385762	0.412106	0.175965
Genus	p__Firmicutes.c__Bacilli.o__Lactobacillales.f__Streptococcaceae.g__Streptococcus	0.0266173	0.6386	3.24661	0.581763
	p__Firmicutes.c__Clostridia.o__Lachnospirales.f__Lachnospiraceae.g__Lachnoclostridium	0.0245046	0.6386	0.0938663	0.257095
	p__Firmicutes.c__Clostridia.o__Lachnospirales.f__Lachnospiraceae.unclassified	0.00608473	0.6386	5.0949	3.30949
	p__Firmicutes.c__Clostridia.o__Oscillospirales.f__Oscillospiraceae.g__UCG-005	0.0266173	0.6386	0.41158	0.0906551
	p__Firmicutes.c__Clostridia.o__Oscillospirales.f__Oscillospiraceae.unclassified	0.0328093	0.6386	0.60435	0.278249
	p__Firmicutes.c__Clostridia.o__Oscillospirales.f__Ruminococcaceae.unclassified	0.0401807	0.6386	2.62956	0.55889
	p__Desulfobacterota.c__Desulfovibrionia.o__Desulfovibrionales.f__Desulfovibrionaceae.unclassified	0.0247605	0.6386	0.00172866	0.00716879
D. Anti-citrullinated protein antibodies (ACPA): Elevated versus Normal concentration
Bacterial taxa		Mann Whitney U test		Mean relative abundance
		Nominal p value	Adjusted p value$	ACPA evevated	ACPA normal
Order	p__Firmicutes.c__Clostridia.o__Clostridia_UCG-014	0.0164221	0.246332	0.312845	0.0408487
	p__Firmicutes.c__Clostridia.o__Oscillospirales	0.0108594	0.246332	18.3833	11.1836
Family	p__Bacteroidota.c__Bacteroidia.o__Bacteroidales.f__Marinifilaceae	0.0386762	0.483453	0.375161	0.150144
	p__Firmicutes.c__Clostridia.o__Clostridia_UCG-014.f__Clostridia_UCG-014	0.0164221	0.410553	0.312845	0.0408487
	p__Firmicutes.c__Clostridia.o__Oscillospirales.f__[Eubacterium]_coprostanoligenes_group	0.0386762	0.483453	1.02412	0.495959
	p__Firmicutes.c__Clostridia.o__Oscillospirales.f__Ruminococcaceae	0.0137208	0.410553	14.2203	8.45243
Genus	p__Firmicutes.c__Clostridia.o__Clostridia_UCG-014.f__Clostridia_UCG-014.g__Clostridia_UCG-014	0.0164221	0.610118	0.312845	0.0408487
	p__Firmicutes.c__Clostridia.o__Oscillospirales.f__[Eubacterium]_coprostanoligenes_group.g__[Eubacterium]_coprostanoligenes_group	0.0386762	0.610118	1.02412	0.495959
	p__Firmicutes.c__Clostridia.o__Oscillospirales.f__Ruminococcaceae.g__Incertae_Sedis	0.0137208	0.610118	0.264443	0.0950764
	p__Firmicutes.c__Clostridia.o__Oscillospirales.f__Ruminococcaceae.g__Subdoligranulum	0.0261751	0.610118	1.72942	0.561384
	p__Firmicutes.c__Clostridia.o__Oscillospirales.f__Ruminococcaceae.unclassified	0.00852566	0.610118	2.86788	0.344004
	p__Bacteroidota.c__Bacteroidia.o__Bacteroidales.f__Prevotellaceae.unclassified	0.0480274	0.610118	0.0283857	0.247708
	p__Firmicutes.c__Clostridia.o__Oscillospirales.f__Ruminococcaceae.g__[Eubacterium]_siraeum_group	0.041976	0.610118	0.00802868	0.0606886
Only taxa with unadjusted p values < 0.05 were included in the table.
$P values adjusted for multiple comparisons using the Benjamini-Hochberg (BH) procedure.
